# Supplementary material
Source: publisher figshare collection journal article supplement (https://gsajournals.figshare.com/ndownloader/files/13020518)
Supplement: Supplementary file 1 [file 13020518]

| **TABLE S1. Plasmids and primers used for this study** | | |
| --- | --- | --- |
| **PLASMID** | **DESCRIPTION** | **PRIMERS (5'-3')** |
| pKF1 | *cut-5p::dex-1* | pMH7_Left - ATGCGCAATAGGCATGCC |
|  |  | pmH7_Right - GTCGACCTGCAGGCATG |
|  |  | cut-5p_Left - TTGCATGCCTGCAGGTCGAaagacgagccaattgg |
|  |  | cut-5p_Right - GAAGGGCATGCCTATTGCGCATgaacaaaatctgga |
| pKF3 | *dex-1p(5.7kb*Δ*)::gfp* | IRS_left - CATTTAGCTTTCTCCGTC |
|  |  | IRS_Right - ATGACAACGAAAAACCAC |
| pKF5 | *cut-6p::dex-1* | pMH7_Left - ATGCGCAATAGGCATGCCC |
|  |  | pMH7_Right - GTCGACCTGCAGGCATGC |
|  |  | cut-6p_Left - CCTGCAGGTCGACcccgaccaattgttatcagtaggag |
|  |  | cut-6p_right - GCATGCCTATTGCGCATctcatttcgcagaagaggcga |
| pJC15 | *dex-1p::dex-1(ecto)::sfgfp* | see Cohen *et al.*, accompanying manuscript |
| pJC24 | *dex-1p::sfgfp::dex-1* | see Cohen *et al.*, accompanying manuscript |
| pMH7 | *dex-1p::dex-1* | see Heiman and Shaham, 2009 |
| pMH8 | *pha-4p::dex-1* | see Heiman and Shaham, 2009 |
| pMH111 | *dex-1p(5.7kb)::gfp* | a gift of Dr. Maxwell Heiman |
| pMH125 | *dex-1p(2.1kb)::gfp* | a gift of Dr. Maxwell Heiman |
| pTG96_2 | *sur-5p::gfp* | a gift of Dr. Trent Gu (Gu *et al.* 1998) |
